# Supplementary material for: Confining the growth of mesoporous silica films into nanospaces: towards surface nanopatterning
Source: Royal Society of Chemistry journal article supplement (doi:10.1039/d1na00654a), 2022-01-01
Supplement: d1na00654a1.pdf [file d1na00654a1.pdf]

## Supporting Information

### Confining the growth of mesoporous silica films into nanospaces: towards surface nanopatterning

*Samantha Soulé,\* Gilles E. Moehl, Ruomeng Huang, Yasir J. Noori, Kian Shen Kiang, C. H. Kees de Groot, Richard Beanland, David C. Smith, Andrew L. Hector\**

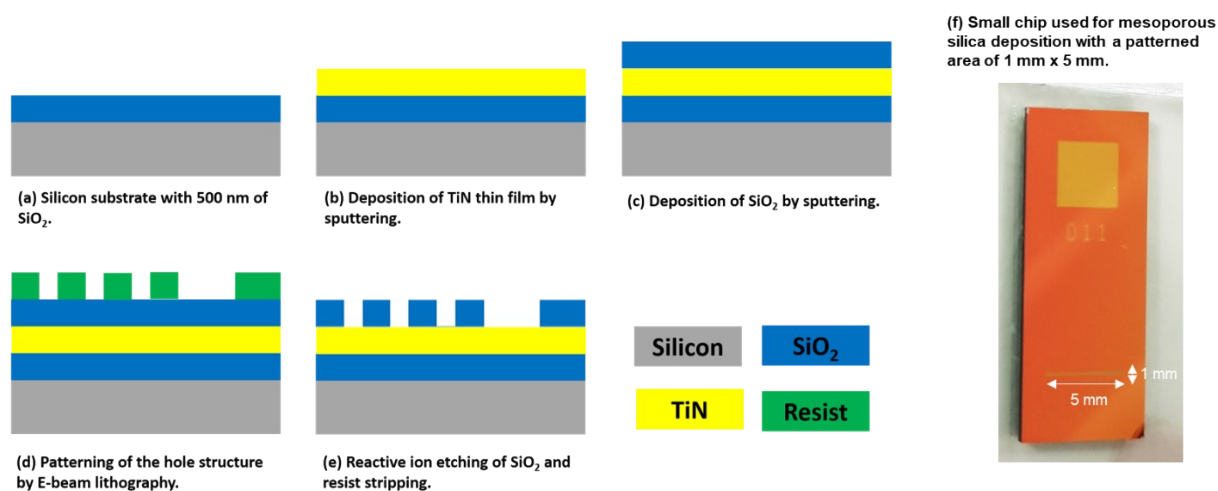

Figure S1- Fabrication process and photograph of the patterned substrate

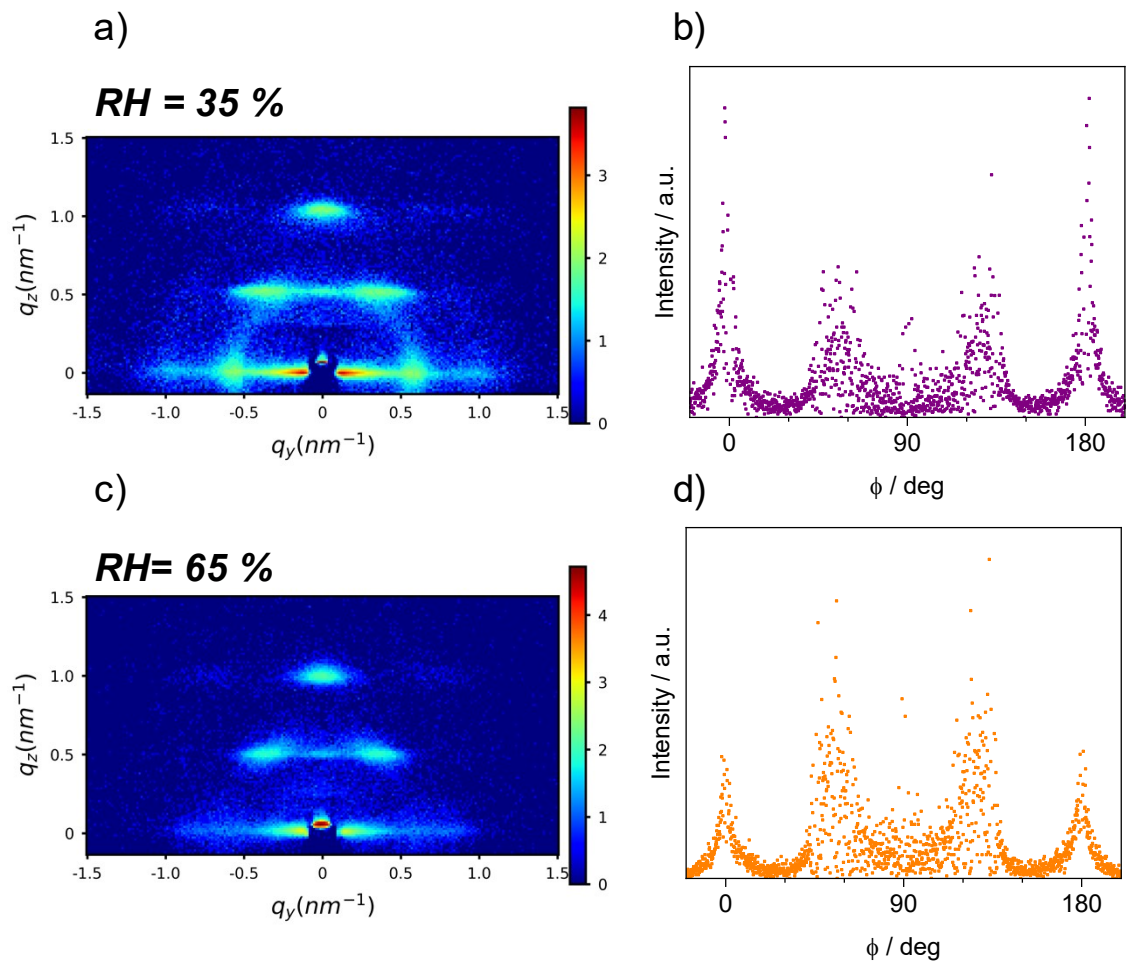

Figure S2- GT-SAXS patterns and the corresponding azimuthal integrations of M-02-35-LiCl (a, b) and M-02-65-LiCl (c, d)

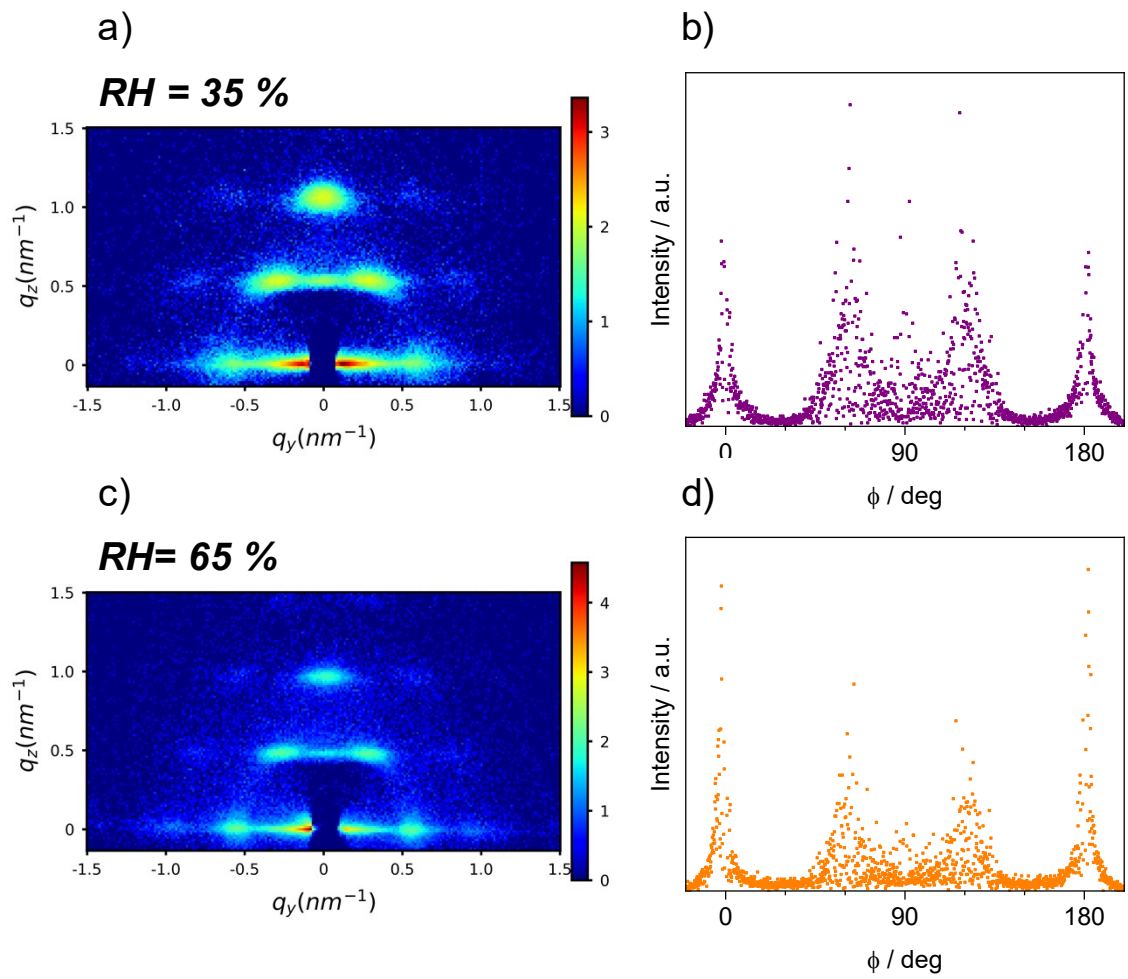

Figure S3- GT-SAXS patterns and the corresponding azimuthal integrations of M-04-35-LiCl (a, b) and M-04-65-LiCl (c, d)

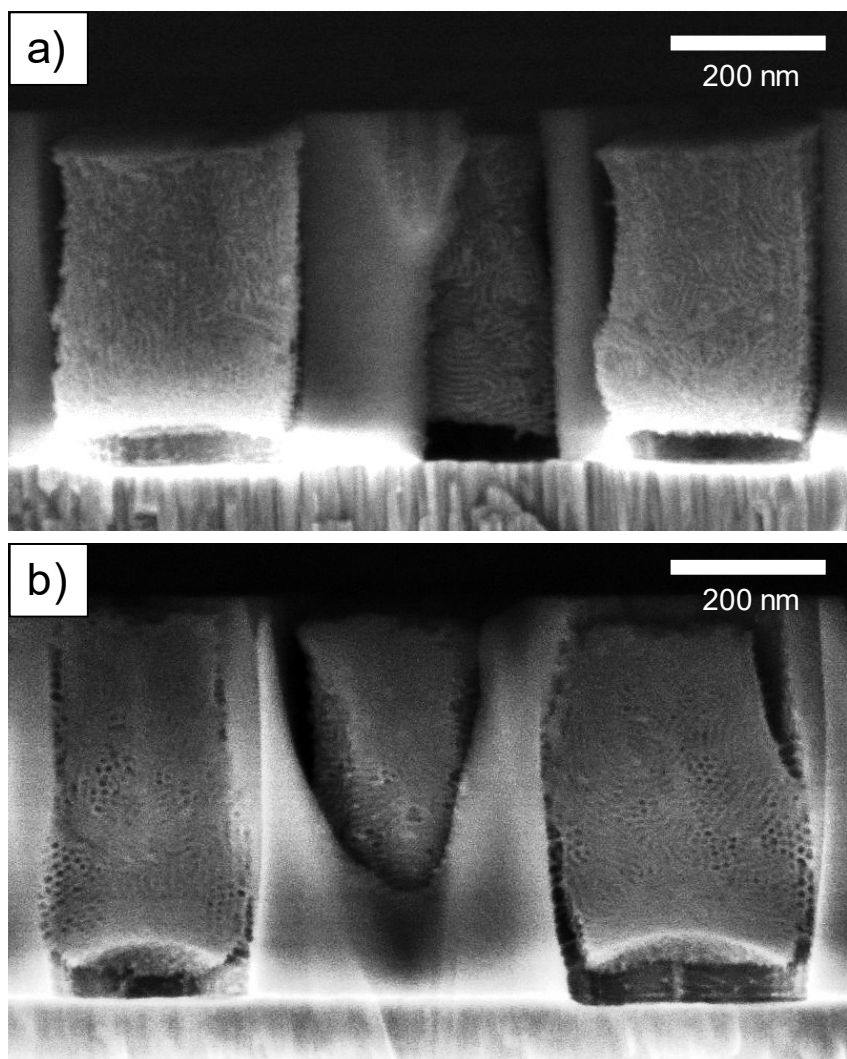

Figure S4- Cross section SEM images of S-04-55-LiCl a) as cleaved and b) ion-milled

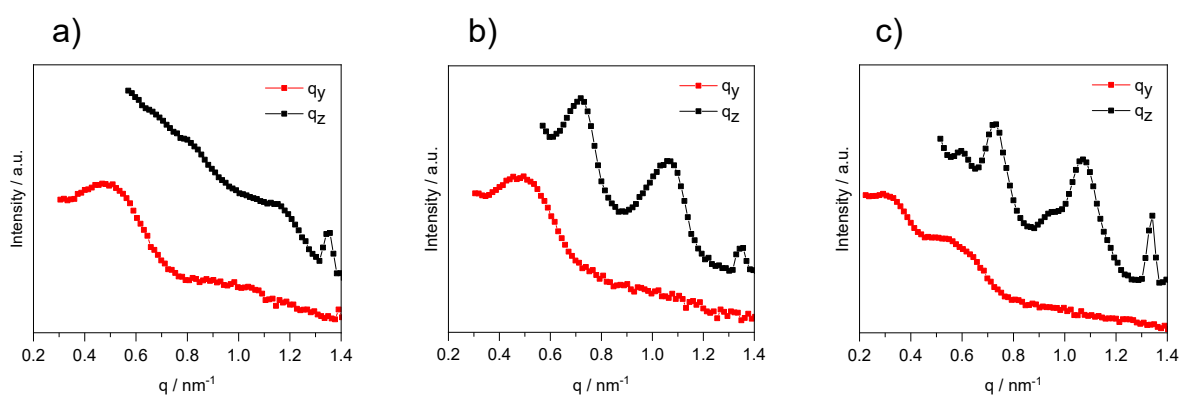

Figure S5- Horizontal ( $q_y$ ) and vertical ( $q_z$ ) linecut signals obtained from the GI-SAXS pattern of a) S-04-55-LiCl, b) S-04-55 and c) S-02-55

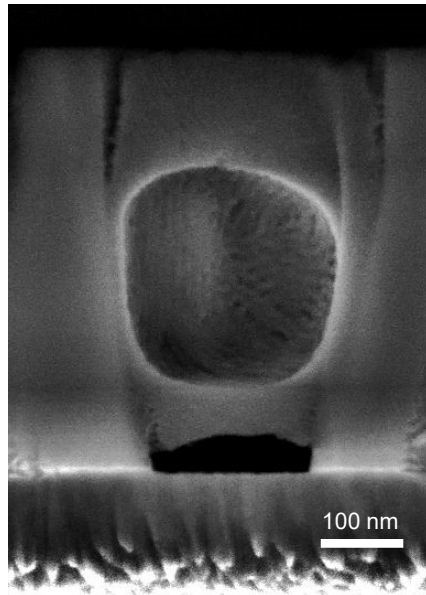

Figure S6- Cross-section SEM image of ion-milled S-04-55-LiCl evidencing a dewetting phenomenon leading to the formation of hole into the mesoporous silica film
